# Supplementary material for: Metastasectomy in Leiomyosarcoma: A Systematic Review and Pooled Survival Analysis
Source: MDPI journal article supplement (doi:10.3390/cancers14133055), 2022-06-21
Supplement: s1 [file s1]

**Table S1.** Total Patients Included in Each Study

| Study              | Total Patients Included in the Study |                              |                                 |                |                           |  | Total undergoing metastasectomy for LMS |
|--------------------|--------------------------------------|------------------------------|---------------------------------|----------------|---------------------------|--|-----------------------------------------|
|                    | Total included                       | Total with metastatic cancer | Total undergoing metastasectomy | Total with LMS | Total with metastatic LMS |  |                                         |
| Anraku 2004        | 133                                  | 133                          | 133                             | 11             | 11                        |  | 11                                      |
| Blackmon 2009      | 234                                  | 234                          | 234                             | 41             | 41                        |  | 41                                      |
| Burt 2011          | 82                                   | 82                           | 82                              | 31             | 31                        |  | 31                                      |
| Chen 1998          | 11                                   | 11                           | 11                              | 11             | 11                        |  | 11                                      |
| Chudgar 2017       | 539                                  | 539                          | 539                             | 169            | 169                       |  | 169                                     |
| Deguchi 2020       | 22                                   | 22                           | 22                              | 5              | 5                         |  | 5                                       |
| Ercolani 2005      | 83                                   | 83                           | 83                              | 10             | 10                        |  | 10                                      |
| Faraj 2015         | 5                                    | 5                            | 5                               | 5              | 5                         |  | 5                                       |
| Farid 2013         | 97                                   | NR                           | 11                              | 97             | NR                        |  | 11                                      |
| Goumard 2018       | 126                                  | 126                          | 126                             | 62             | 62                        |  | 62                                      |
| Kato 2020          | 10                                   | 10                           | 10                              | 10             | 10                        |  | 10                                      |
| Kim 2017           | 10                                   | 10                           | 10                              | 10             | 10                        |  | 10                                      |
| Lang 2000          | 26                                   | 26                           | 26                              | 26             | 26                        |  | 26                                      |
| Liebl 2007         | 42                                   | 42                           | 42                              | 13             | 13                        |  | 13                                      |
| Lin 2015           | 155                                  | 155                          | 155                             | 26             | 26                        |  | 26                                      |
| Marudanayagam 2010 | 36                                   | 36                           | 36                              | 20             | 20                        |  | 20                                      |
| Paramanathan 2013  | 13                                   | 13                           | 12                              | 12             | 12                        |  | 12                                      |
| Rao 2008           | 80                                   | 51                           | 51                              | 21             | 21                        |  | 21                                      |
| Smith 2009         | 94                                   | 94                           | 94                              | 22             | 22                        |  | 22                                      |
| van Cann 2018      | 122                                  | 122                          | 28                              | 122            | 122                       |  | 28                                      |
| Zacherl 2011       | 15                                   | 15                           | 15                              | 9              | 9                         |  | 9                                       |
| Zhang 2015         | 27                                   | 27                           | 27                              | 12             | 12                        |  | 12                                      |
| Ziewacz 2012       | 8                                    | 8                            | 8                               | 8              | 8                         |  | 8                                       |
| Total patients     | 1970                                 | 1844                         | 1760                            | 753            | 656                       |  | 573                                     |

NR: Not recorded
