# Supplementary material for: Metastasectomy in Leiomyosarcoma: A Systematic Review and Pooled Survival Analysis
Source: MDPI journal article supplement (doi:10.3390/cancers14133055), 2022-06-21
Supplement: s1 [file s1]

**Table S4.** NOS for Cohort Studies

| Criteria                                                                 | Farid 2013 | Van Cann 2018 |
|--------------------------------------------------------------------------|------------|---------------|
| <i>Selection</i>                                                         |            |               |
| Representativeness of the exposed cohort                                 | ✱          | ✱             |
| Selection of non exposed cohort                                          | ✱          | ✱             |
| Ascertainment of exposure                                                | ✱          | ✱             |
| Demonstration that outcome of interest was not present at start of study | ✱          | ✱             |
| <i>Comparability</i>                                                     |            |               |
| Comparability of cohorts                                                 |            | ✱             |
| <i>Outcome</i>                                                           |            |               |
| Assessment of outcome                                                    | ✱          | ✱             |
| Was follow-up long enough for outcomes to occur                          |            | ✱             |
| Adequacy of follow up of cohorts                                         |            | ✱             |
