# Supplementary material for: Metastasectomy in Leiomyosarcoma: A Systematic Review and Pooled Survival Analysis
Source: MDPI journal article supplement (doi:10.3390/cancers14133055), 2022-06-21
Supplement: s1 [file s1]

**Table S3.** JBI Critical Appraisal Checklist for Case Series

| Study              | Question |         |         |     |     |     |     |         |     |     |
|--------------------|----------|---------|---------|-----|-----|-----|-----|---------|-----|-----|
|                    | 1        | 2       | 3       | 4   | 5   | 6   | 7   | 8       | 9   | 10  |
| Anraku 2004        | No       | Unclear | Unclear | Yes | Yes | No  | No  | No      | Yes | Yes |
| Blackmon 2009      | Yes      | Yes     | Yes     | Yes | Yes | No  | No  | Yes     | Yes | Yes |
| Burt 2011          | Yes      | Unclear | Unclear | Yes | Yes | Yes | No  | No      | Yes | Yes |
| Chen 1998          | Yes      | Unclear | Unclear | Yes | Yes | Yes | No  | Yes     | Yes | Yes |
| Chudgar 2017       | Yes      | Unclear | Unclear | Yes | Yes | No  | No  | Yes     | Yes | Yes |
| Deguchi 2020       | Yes      | Yes     | Unclear | No  | Yes | No  | Yes | No      | Yes | Yes |
| Ercolani 2005      | Yes      | Unclear | Yes     | No  | Yes | No  | No  | No      | Yes | Yes |
| Faraj 2015         | Yes      | Yes     | Yes     | No  | Yes | Yes | No  | Yes     | Yes | Yes |
| Goumard 2018       | Yes      | Yes     | Yes     | Yes | Yes | No  | No  | Yes     | Yes | No  |
| Kato 2020          | Yes      | Yes     | Yes     | Yes | Yes | Yes | Yes | Yes     | Yes | Yes |
| Kim 2017           | Yes      | Yes     | Yes     | Yes | Yes | Yes | Yes | No      | Yes | No  |
| Lang 2000          | Yes      | Unclear | Unclear | No  | Yes | Yes | No  | Yes     | No  | Yes |
| Liebl 2007         | Yes      | Unclear | Yes     | Yes | Yes | No  | No  | Unclear | Yes | No  |
| Lin 2015           | Yes      | Unclear | Unclear | Yes | Yes | No  | No  | Yes     | Yes | Yes |
| Marudanayagam 2010 | Yes      | Unclear | Yes     | Yes | Yes | No  | No  | Yes     | No  | No  |
| Paramanathan 2013  | Yes      | Yes     | Unclear | Yes | Yes | Yes | No  | Unclear | Yes | Yes |
| Rao 2008           | Yes      | Unclear | Unclear | Yes | Yes | No  | No  | Yes     | Yes | Yes |
| Smith 2009         | Yes      | Unclear | Unclear | Yes | Yes | No  | No  | Yes     | Yes | Yes |
| Zacherl 2011       | Yes      | Unclear | Yes     | No  | Yes | Yes | Yes | Yes     | Yes | Yes |
| Zhang 2015         | Yes      | Yes     | Unclear | Yes | Yes | No  | No  | Yes     | Yes | Yes |
| Ziewacz 2012       | Yes      | Yes     | Unclear | Yes | Yes | Yes | No  | Yes     | Yes | Yes |
