# Supplementary material for: Metastasectomy in Leiomyosarcoma: A Systematic Review and Pooled Survival Analysis
Source: MDPI journal article supplement (doi:10.3390/cancers14133055), 2022-06-21
Supplement: s1 [file s1]

**Table S5.** Components of GRADE (Grading of Recommendation, Assessment, Development and Evaluation) to Assess the Certainty of Evidence

| Grade Domain                              | Judgement                                                                                                                                                                                                                                       | Concerns about certainty domains |
|-------------------------------------------|-------------------------------------------------------------------------------------------------------------------------------------------------------------------------------------------------------------------------------------------------|----------------------------------|
| Methodological limitations of the studies | All studies included were cohort or case series studies, resulting in confounding and selection bias due to lack of randomization.                                                                                                              | Serious                          |
| Indirectness                              | The patients, interventions and comparators (when available) provided direct evidence of the clinical question at hand. All interventions included metastasectomy of individuals with at least 5 individuals with LMS                           | Not serious                      |
| Imprecision                               | The range of post-metastasectomy overall survival in studies varied greatly between studies included, with significant heterogeneity.                                                                                                           | Serious                          |
| Inconsistency                             | The estimated post-metastasectomy overall survival in studies varied greatly between studies included, with significant heterogeneity.                                                                                                          | Serious                          |
| Publication Bias                          | Comparative studies including patients who did not undergo metastasectomy or included sufficient details on alternative treatments were not widely available limiting the conclusion that can be drawn regarding the benefit of metastasectomy. | Serious                          |
