# Supplementary material for: Metastasectomy in Leiomyosarcoma: A Systematic Review and Pooled Survival Analysis
Source: MDPI journal article supplement (doi:10.3390/cancers14133055), 2022-06-21
Supplement: s1 [file s1]

**Table S2.** Post-Metastasectomy LMS-Specific Outcomes

| Study                  | Primary site of metastasectomy | Follow up duration post-metastasectomy (months) | Median OS months (range) | OS % (95% CI)                                         | Median DFS months (range) | DFS % (95% CI)             |
|------------------------|--------------------------------|-------------------------------------------------|--------------------------|-------------------------------------------------------|---------------------------|----------------------------|
| Anraku 2004            | Lung                           | Median 40 (range 0-220)                         | 33 (1-100)               | 5-yr 38 (6-70)                                        | NR                        | NR                         |
| Blackmon 2009          | Lung                           | Median 27 (SD $\pm$ 33)                         | 42 (NR)                  | NR                                                    | NR                        | NR                         |
| Burt 2011              | Lung                           | NR                                              | 70 (0-100)               | 5-yr 52 (NR)                                          | NR                        | NR                         |
| Chen 1998              | Liver                          | Median 53 (range 23-98)                         | 39 (18-55)               | NR                                                    | NR                        | NR                         |
| Chudgar 2017           | Lung                           | Median 27 (range 0-244)                         | 42 (NR)                  | NR                                                    | 6 (NR)                    | NR                         |
| Deguchi 2020           | Brain                          | NR                                              | 14 (3-21)                | NR                                                    | NR                        | NR                         |
| Ercolani 2005          | Liver                          | Median 36 (range 6-168)                         | 44 (13-87)               | 3-yr 64 (NR); 5-yr 37 (NR)                            | NR                        | 3-yr 44 (NR); 5-yr 22 (NR) |
| Faraj 2015             | Liver                          | NR                                              | 18 (7-135)               | NR                                                    | NR                        | NR                         |
| Farid 2013             | NR                             | NR                                              | 205 (45-205)             | NR                                                    | NR                        | NR                         |
| Goumard 2018           | Liver                          | Median 38 (range NR)                            | 62 (10-120)              | NR                                                    | 13 (0-83)                 | NR                         |
| Kato 2020              | Spine                          | Mean 47 (range 12-97)                           | 45 (12-97)               | 3-yr 70 (NR) <sup>a</sup> ; 5-yr 47 (NR) <sup>a</sup> | NR                        | NR                         |
| Kim 2017               | Liver                          | NR                                              | 19 (8-170)               | NR                                                    | NR                        | NR                         |
| Lang 2000 <sup>b</sup> | Liver                          | NR                                              | 32 (1-84)                | 5-yr 13 (NR)                                          | NR                        | NR                         |
| Liebl 2007             | Lung                           | Median 27 (range NR)                            | 27 (NR)                  | NR                                                    | NR                        | NR                         |

|                                |       |                                   |             |                               |                      |                              |
|--------------------------------|-------|-----------------------------------|-------------|-------------------------------|----------------------|------------------------------|
| Lin 2015                       | Lung  | Mean 14<br>(range 1-192)          | NR          | 3-yr 69 (NR);<br>5-yr 61 (NR) | NR                   | 1-yr 49 (NR);<br>3-yr 9 (NR) |
| Marudanayagam 2010             | Liver | Median 24<br>(range NR)           | NR          | 5-yr 25 (NR)                  | NR                   | NR                           |
| Paramanathan 2013 <sup>c</sup> | Lung  | Median 26<br>(range 1-109)        | 76 (12-108) | 3-yr 76 (NR);<br>5-yr 66 (NR) | 40 (NR) <sup>d</sup> | NR                           |
| Rao 2008                       | Spine | Median 26<br>(range 1-131)        | 14 (9-19)   | NR                            | NR                   | NR                           |
| Smith 2009                     | Lung  | Minimum 60<br>for all<br>patients | 24 (NR)     | NR                            | NR                   | NR                           |
| Van Cann 2018                  | Lung  | Median 45<br>(range 19-127)       | 83 (4-127)  | NR                            | NR                   | NR                           |
| Zacherl 2011                   | Liver | NR                                | 32 (0-80)   | NR                            | 16 (0-64)            | NR                           |
| Zhang 2015                     | Liver | NR                                | NR          | 5-yr 35 (NR)                  | NR                   | NR                           |
| Ziewacz 2012                   | Spine | NR                                | 11 (3-23)   | NR                            | NR                   | NR                           |

<sup>a</sup> Cancer-specific survival; <sup>b</sup> First hepatic metastasectomy cohort; <sup>c</sup> One patient with endometrial stromal sarcoma included in the LMS patient data presented; <sup>d</sup> Uncontrollable disease-free survival (UDFS) was defined by the authors as being measured from the date of the first surgery to inoperability based on disease outside the chest, innumerable lung metastases, or exceeding the limit of respiratory reserve for further resections
